# Supplementary material for: Modulation of the effects of Class-Ib antiarrhythmics on cardiac NaV1.5-encoded channels by accessory NaVβ subunits
Source: JCI journal article supplement (doi:10.1172/jci.insight.143092), 2021-06-22
Supplement: sd1 [file 1]

**Supplement Figure 1: qRT-PCR analyses of the transcripts encoding all Nav $\beta$  subunits and the major Nav  $\alpha$  subunits in the atria and left ventricles (LV) of WT and *Scn1b* null mice.**

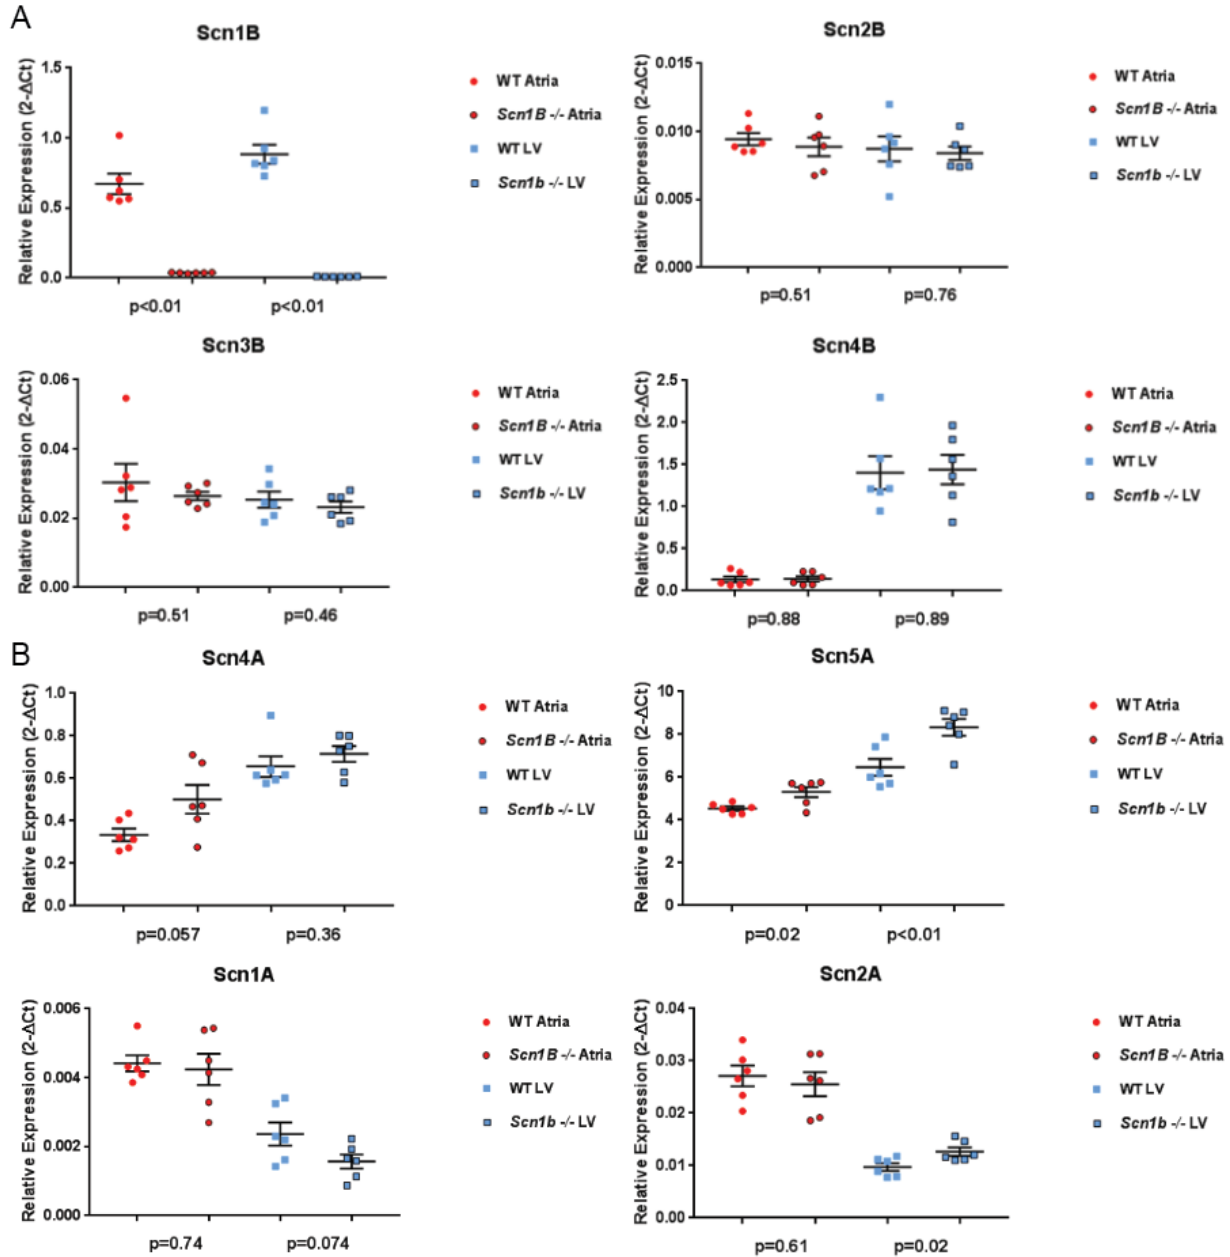

A. The *Scn1B* transcript is undetectable in the atria and LV of *Scn1b* null mice. The expression of the *Scn2B*, *Scn3B*, and *Scn4B* transcripts in *Scn1b* null and WT atria and LV are indistinguishable from WT atria and LV. B. Expression of the *Scn5A* transcript, however, is

higher in the atria and LV of *Scn1b* null, compared to WT, mice. *Scn2A* transcript expression is also increased in *Scn1b* null LV, compared with WT LV.

**Supplement Figure 2: Effects of lidocaine and ranolazine on the voltage dependence of steady-state inactivation of  $I_{Na}$  in WT and *Scn1b* null mouse LV myocytes.**

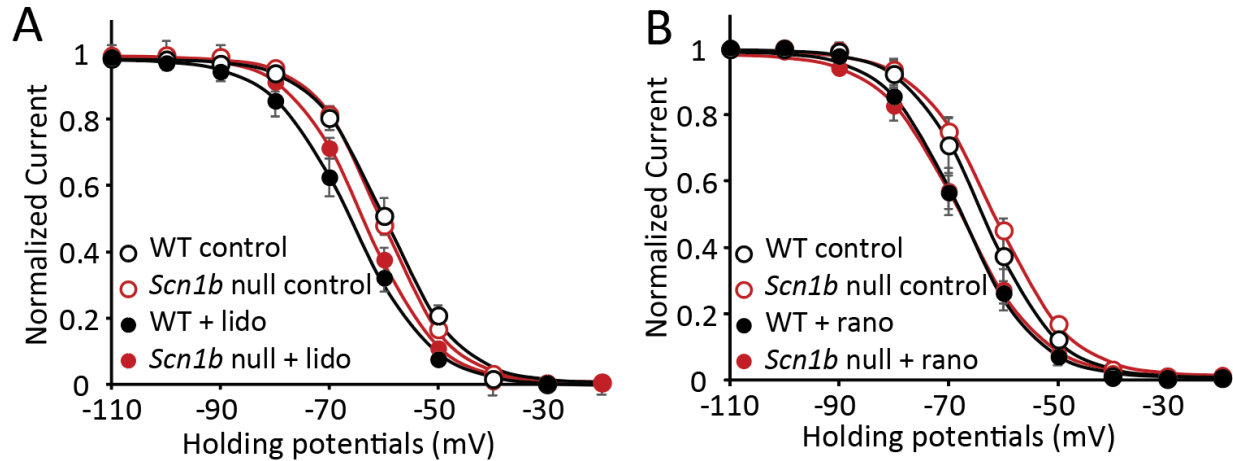

A. 100 $\mu$ M Lidocaine induced a small hyperpolarizing shift in the voltage dependence of  $I_{Na}$

- 5 inactivation in WT and *Scn1b* null LV myocytes, although the magnitude of the shift is smaller in *Scn1b* null myocytes. B. 100 $\mu$ M ranolazine resulted in similar small shifts in the voltage dependences of  $I_{Na}$  inactivation in WT and *Scn1b* null LV myocytes.

**Supplement Figure 3: Quantified ST interval from ECG recordings obtained from WT and *Scn1b* null mice before and after IP injections of lidocaine or ranolazine.**

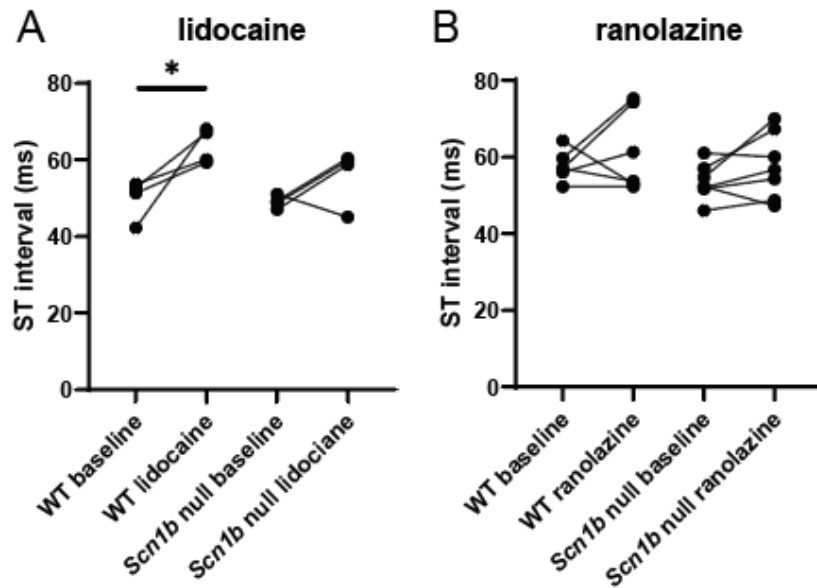

A. The ST interval is increased in WT, but not *Scn1b* null, mice in response to lidocaine. B. ST

5 intervals are not measurably changed in either WT or *Scn1b* null mice after ranolazine injection.

**Supplement Figure 4: ECG recordings obtained from WT and *Scn1b* null mice before and after IP injections of control (PBS) buffer.**

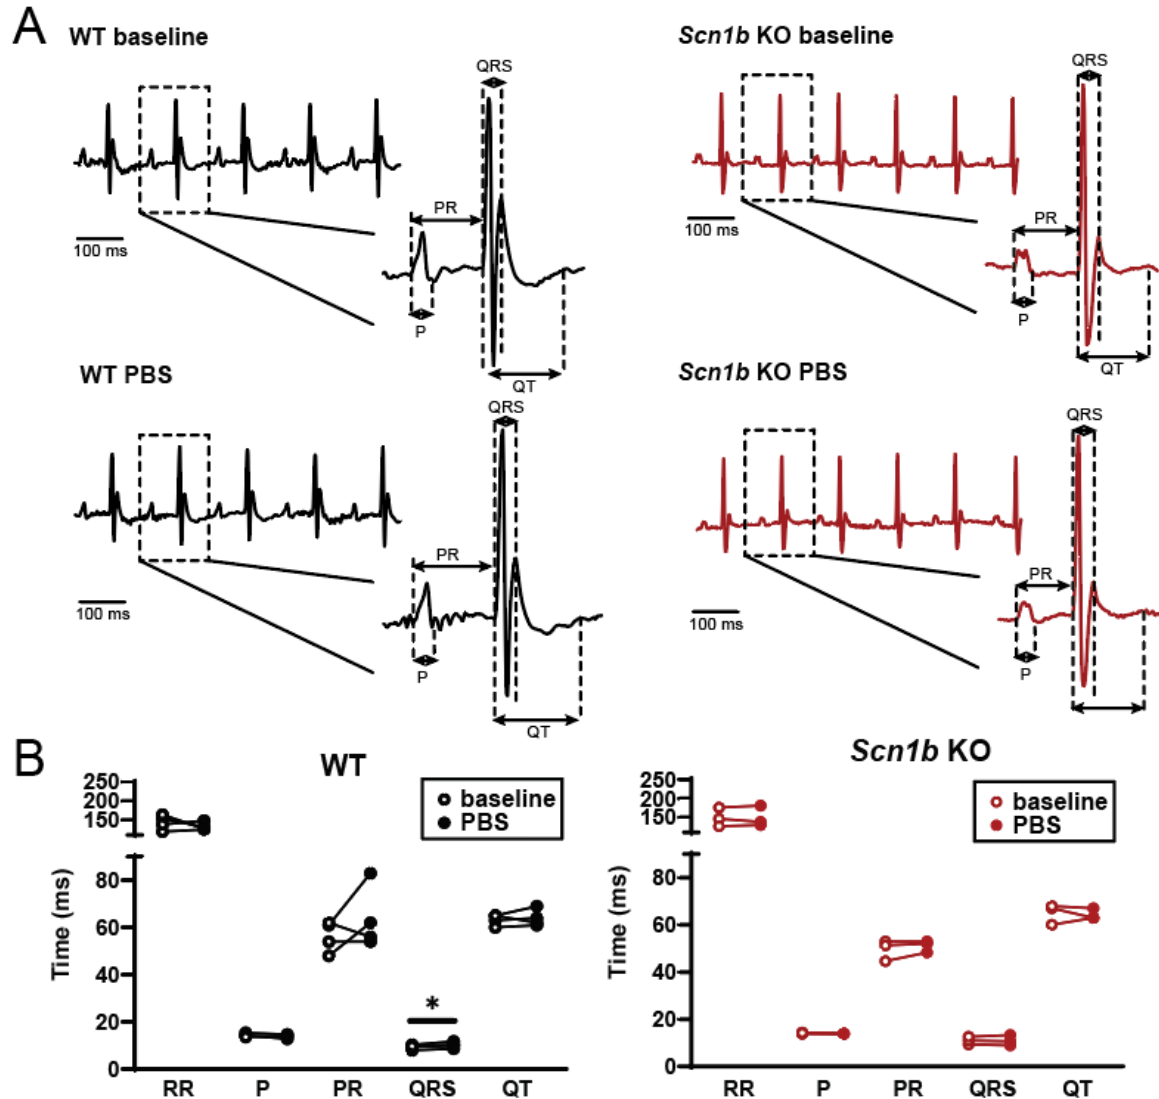

A. Representative ECG recordings from WT (black traces) and *Scn1b* null (red traces) mice at

5 baseline and 10 minutes after IP injections of PBS. B. Quantification of ECG parameters, including RR intervals, P wave durations, PR, QRS, and QT intervals revealed that injection of PBS does not measurably affect ECG parameters.

**Supplement Figure 5: qRT-PCR analyses of expression of the two *SCN1B* splice variants, *SCN1Ba* and *SCN1Bb*, in the four chambers of the human heart.**

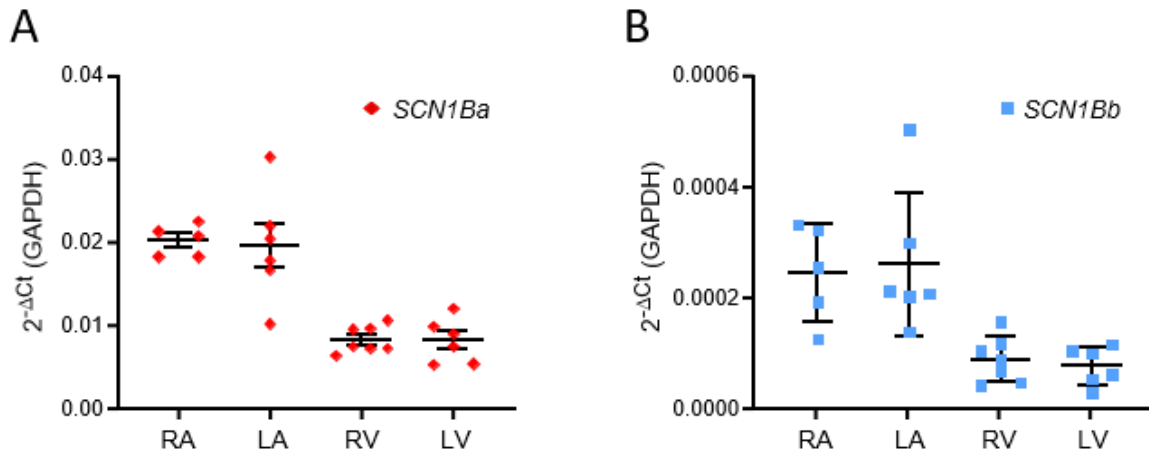

Note that the *SCN1Ba* transcript (A), which encodes the  $\text{Na}_v\beta 1$  protein, is expressed at  $\sim 100$ -

5 fold higher levels than the *SCN1Bb* (B) transcript, which encodes the secreted  $\text{Na}_v\beta 1b$  protein.

In addition, the expression levels of both the *SCN1Ba* (A) and the *SCN1Bb* (B) transcripts are higher in the right and left atria (RA and LA), compared to the right and left ventricles (RV and LV).

Supplement Figure 6: Expression profile of human *SCN1B* and mouse *Scn1b* in normal and failing ventricular tissues.

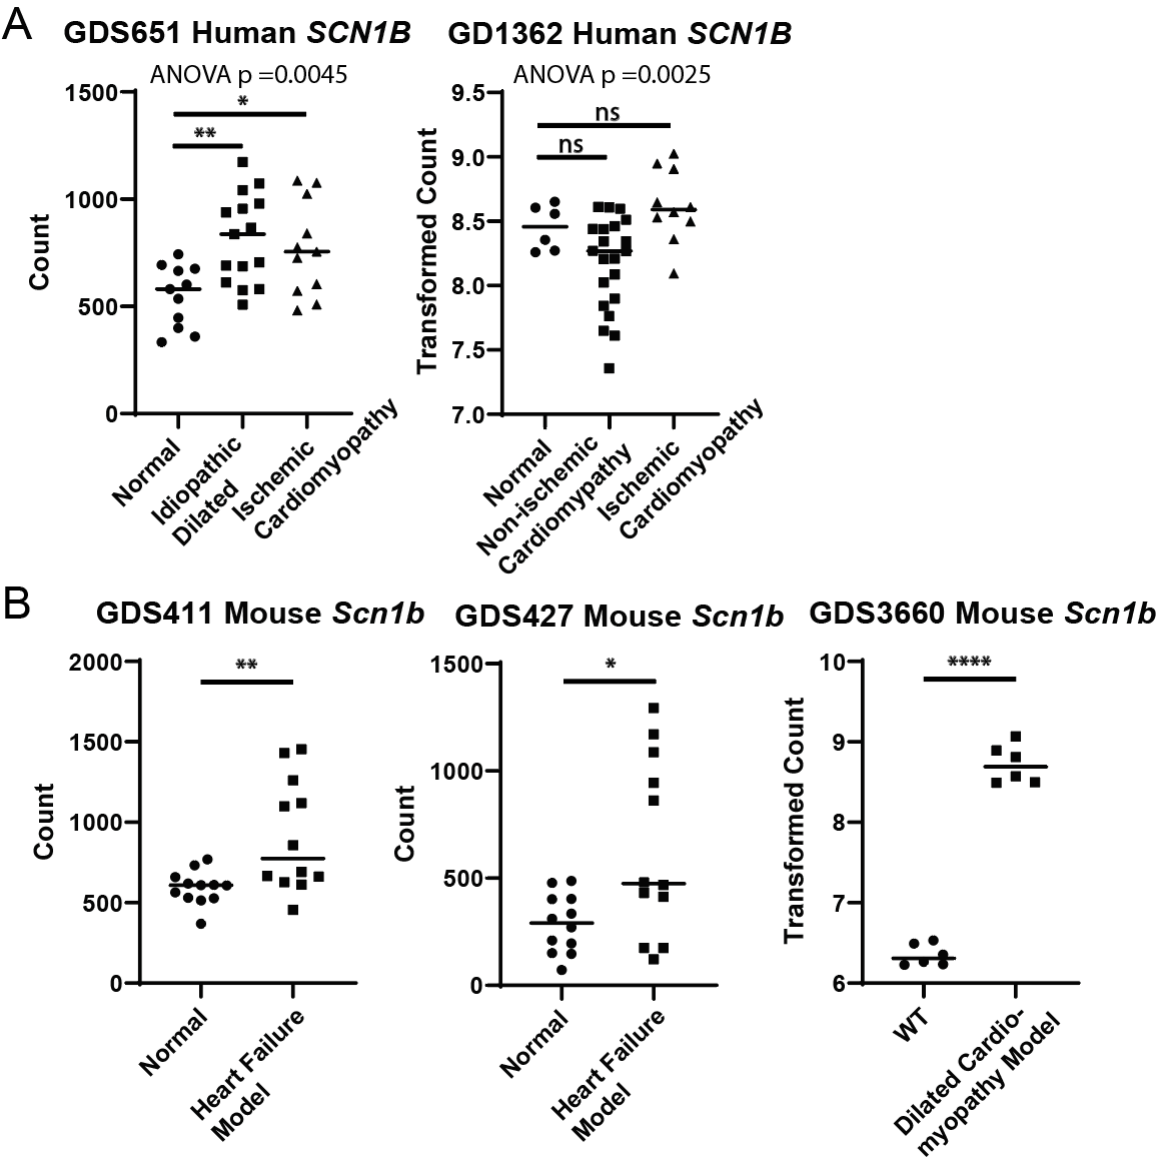

Microarray data showing *SCN1B* and *Scn1b* expression were extracted from the GEO Profile  
5 database (GEO accession GDS651, GDS1362, GDS411, GDS427, and GDS3660). All studies  
investigating dilated cardiomyopathy from the GEO database are shown here for comparison,  
with a filter of overall sample size greater than 20 and samples collected from the ventricles. A.  
Two studies assessing gene expression change in non-ischemic and ischemic cardiomyopathy in

human heart. Both studies indicated an increase in *SCN1B* expression in ischemic cardiomyopathy. B. *Scn1b* is upregulated in murine heart failure models compared to control. Genetic heart failure models were generated by deleting the muscle LIM protein gene (MLP<sup>-/-</sup>) or overexpressing the calsequestrin protein (GDS411 and GDS427). The dilated cardiomyopathy models used in GDS3660 were transgenic mice expressing a dominant negative CREB transcription factor.



**Supplement Table 1: ECG parameters for WT and *Scn1b* null mice before and after ranolazine or lidocaine IP injection.**

| <i>Mouse genotypes</i>       |              |              | WT<br>Total n = 13 |             |             |         |
|------------------------------|--------------|--------------|--------------------|-------------|-------------|---------|
| <i>ECG parameters (msec)</i> | Baseline     | Ranolazine   | p-value            | Baseline    | Lidocaine   | p-value |
| <i>RR interval</i>           | 161.3 ± 10.1 | 170.2 ± 21.2 | 0.601              | 139.0 ± 4.9 | 165.3 ± 3.8 | 0.116   |
| <i>P wave duration</i>       | 13.1 ± 0.2   | 13.5 ± 0.4   | 0.233              | 13.5 ± 0.7  | 15.6 ± 0.5  | 0.009   |
| <i>PR interval</i>           | 52.1 ± 2.3   | 56.2 ± 1.8   | 0.199              | 62.8 ± 3.3  | 66.8 ± 5.2  | 0.041   |
| <i>QRS duration</i>          | 10.1 ± 0.7   | 12.0 ± 0.8   | 0.001              | 12.0 ± 0.6  | 13.0 ± 0.6  | <0.0001 |
| <i>QT interval</i>           | 67.8 ± 1.5   | 73.7 ± 5.0   | 0.269              | 62.0 ± 1.8  | 77 ± 2.1    | 0.035   |
| <i>QTc interval *</i>        | 53.7 ± 1.4   | 56.9 ± 0.8   | 0.087              | 52.6 ± 0.8  | 59.9 ± 1.0  | 0.038   |

  

| <i>Mouse genotypes</i>       |             |              | <i>Scn1b</i> null<br>Total n = 12 |             |              |         |
|------------------------------|-------------|--------------|-----------------------------------|-------------|--------------|---------|
| <i>ECG parameters (msec)</i> | Baseline    | Ranolazine   | p-value                           | Baseline    | Lidocaine    | p-value |
| <i>RR interval</i>           | 145.1 ± 8.4 | 158.1 ± 12.1 | 0.018                             | 137.8 ± 4.5 | 157.0 ± 11.2 | 0.212   |
| <i>P wave duration</i>       | 13.0 ± 0.8  | 16.2 ± 0.8   | 0.043                             | 13.8 ± 0.3  | 15.2 ± 0.4   | 0.008   |
| <i>PR interval</i>           | 55.9 ± 2.9  | 68.5 ± 3.6   | 0.200                             | 47.6 ± 2.6  | 61.3 ± 3.7   | 0.004   |
| <i>QRS duration</i>          | 9.6 ± 0.3   | 12.7 ± 0.2   | 0.177                             | 9.5 ± 0.2   | 13.3 ± 0.9   | 0.029   |
| <i>QT interval</i>           | 63.1 ± 1.7  | 70.4 ± 3.2   | 0.038                             | 58.5 ± 1.0  | 69.3 ± 4.5   | 0.134   |
| <i>QTc interval *</i>        | 52.6 ± 1.2  | 56.2 ± 0.9   | 0.016                             | 50.3 ± 0.6  | 55.2 ± 1.6   | 0.092   |

\* Corrected QT (QTc) intervals shown were calculated based on Bazett's formula adapted for

5 mice  $QTc = QT/(RR/f)^{1/2}$ ,  $f=100ms$ .
